# Supplementary material
Source: Springer Nature journal article supplement (https://www.springermedizin.de/resource/supplementary/12885_2013_4369_MOESM6_ESM.pdf/9466074)
Supplement: MOESM6 [file 9466074]

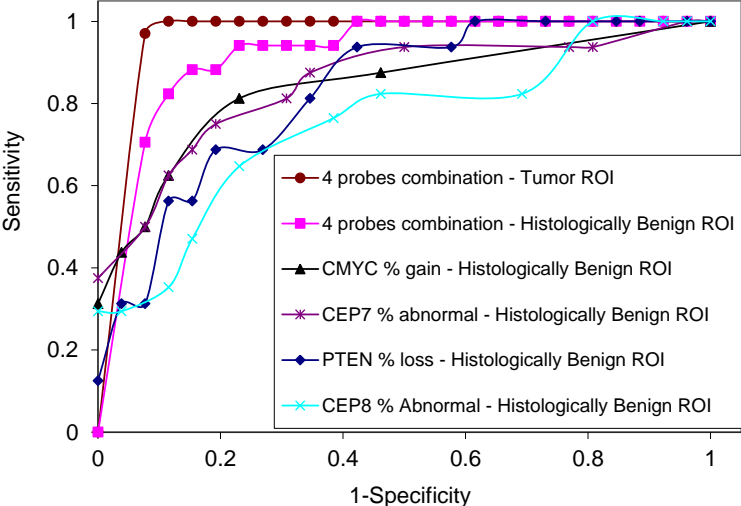

| Parameter                                        | AUC   |
|--------------------------------------------------|-------|
| 4 Probes Combination-Tumour ROI                  | 0.960 |
| 4 Probes Combination – Histologically Benign ROI | 0.917 |
| MYC%Gain – Histologically Benign ROI             | 0.846 |
| CEP7%Abnormal – Histologically Benign ROI        | 0.845 |
| PTEN%Loss – Histologically Benign ROI            | 0.827 |
| CEP8%Abnormal – Histologically Benign ROI        | 0.752 |
